# Supplementary material
Source: publisher figshare collection journal article supplement (https://acs.figshare.com/ndownloader/files/3765193)
Supplement: Supplementary file 1 [file 3765193]

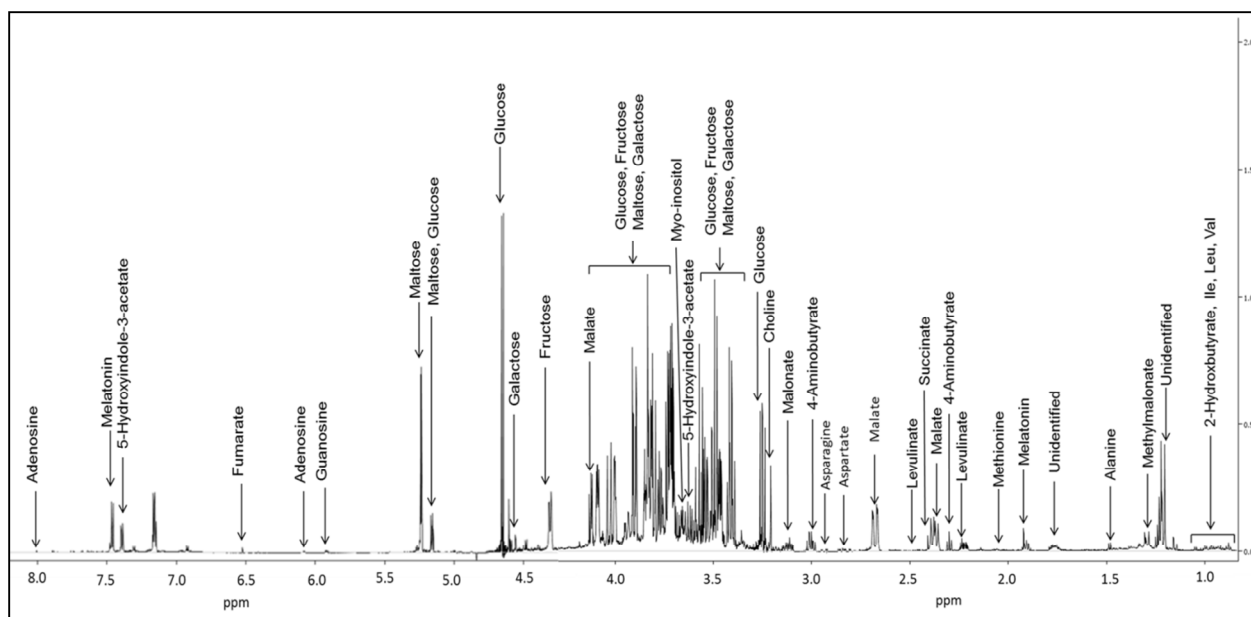

**Supplemental Figure 1.** A representative of 1D  $^1\text{H}$ -NMR watermelon spectrum. Both PM resistant and susceptible rootstock and scion spectra are qualitatively identical.

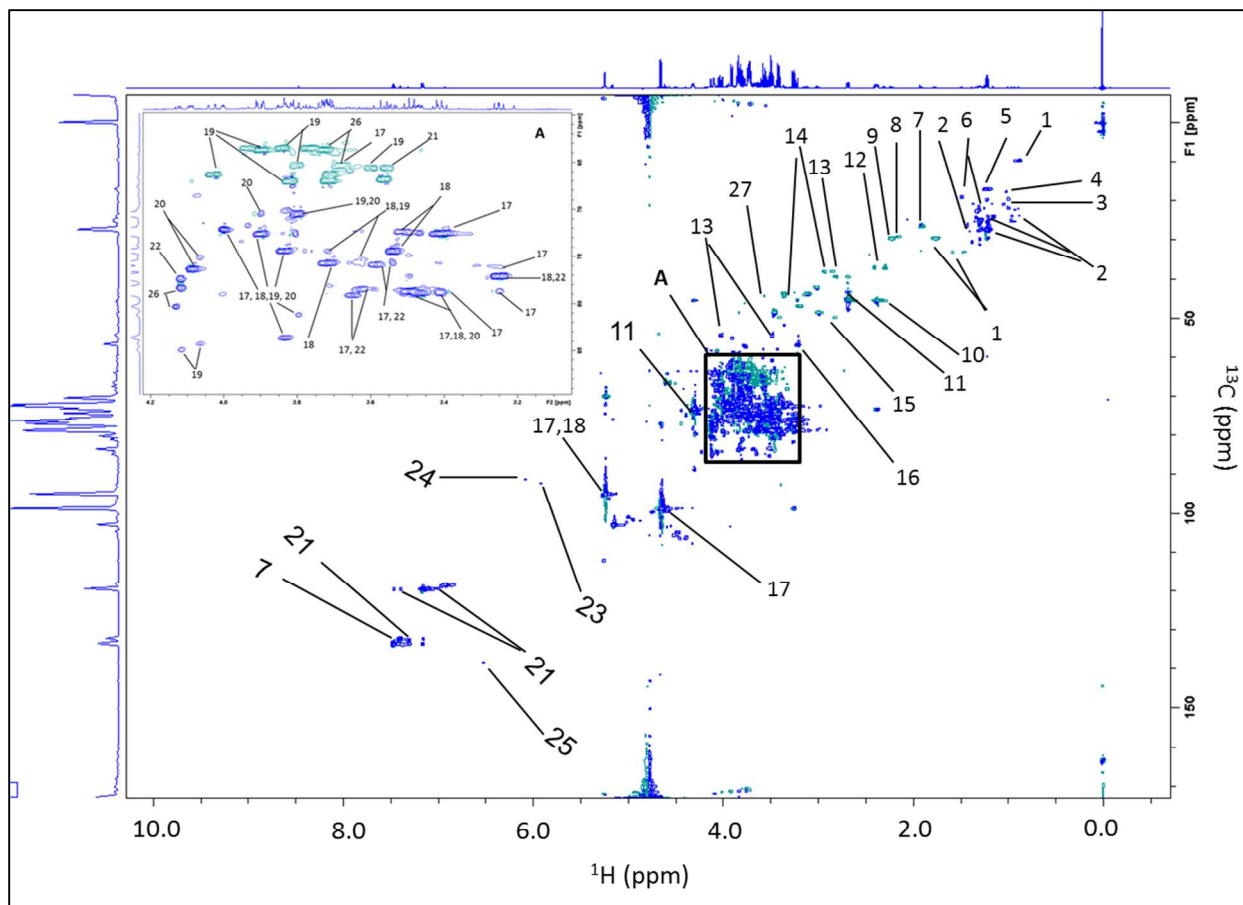

**Supplemental Figure 2.** The corresponding 2D  $^1\text{H}$ - $^{13}\text{C}$  NMR watermelon spectrum. Each number indicates a metabolite found in the 1D  $^1\text{H}$ -NMR spectrum (Supplemental Figure 1). The  $^1\text{H}$  and  $^{13}\text{C}$  chemical shifts for each identified metabolite are listed in Table 2.

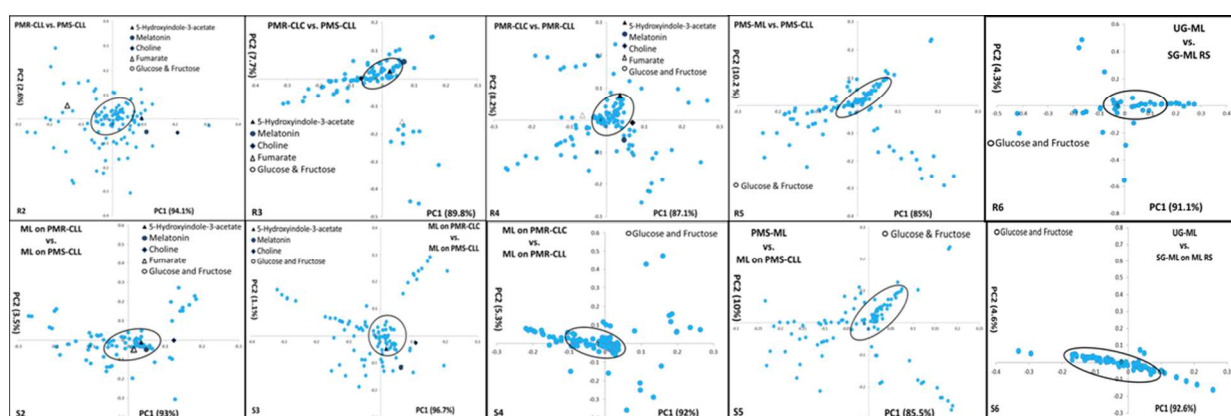

**Supplemental Figure 3. Loading Plots corresponding to PCA scores plots.** Each point in the loading plots represents a bucket (multiple buckets can represent a single metabolite). Significant buckets were calculated by Bonferroni corrected confidence intervals. R2, R3, R4, R5, & R6 are the pairwise comparison of rootstocks; **R2)** PMR-CLL vs. PMS-CLL, **R3)** PMR-CLC vs. PMS-CLL, **R4)** PMR-CLC vs. PMR-CLL, **R5)** PMS Mickey Lee vs. PMS-CLL, and **R6)** UG-ML vs. SG-ML RS. S2, S3, S4, S5, & S6 are the pairwise comparison of the corresponding scion; **S2)** ML grafted on PMR-CLL vs. ML grafted on PMS-CLL, **S3)** ML grafted on PMR-CLC vs. ML grafted on PMS-CLL, **S4)** ML on PMR-CLC vs. ML on PMR-CLL, **S5)** PMS Mickey Lee vs. ML grafted on PMS-CLL, and **S6)** UG-ML vs. SG-ML on ML RS. 5-hydroxyindole-3-acetate, choline, melatonin, fumarate, glucose and fructose were identified as significant metabolites

from PMR rootstock and scion comparisons R2, R3, R4, S2, & S3. Glucose and fructose were identified as significant metabolites in PMS-CLL rootstock and scion comparisons R5, S4, & S5.

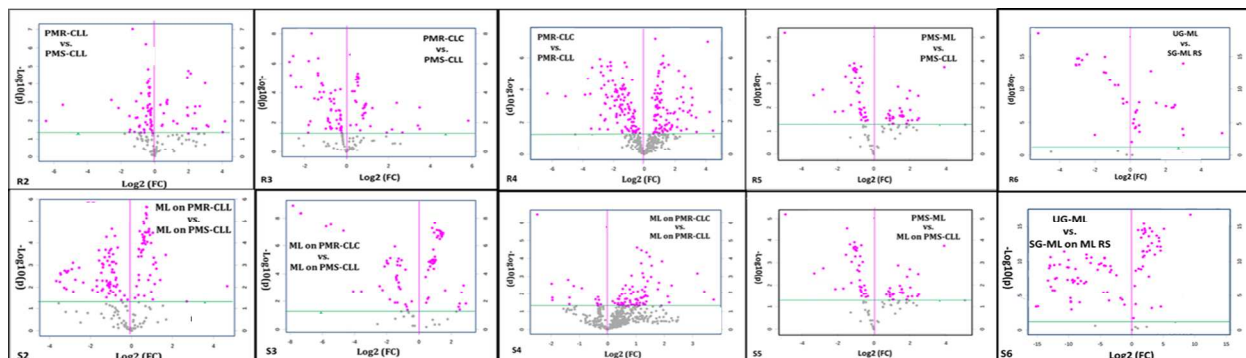

**Supplemental Figure 4. Volcano Plots corresponding to PCA loading plots.** Each point in the volcano plot represents a bucket (multiple buckets can represent a single metabolite). Significant buckets were calculated by a fold change threshold of 1 and a minimum p-value of 0.05. The pink dots above the horizontal p-value line ( $-\log_{10}(0.05) = 1.3$ ) indicate statistically significant buckets with p-values  $< 0.05$ , and the grey dots below the p-value line represent statistically non-significant buckets. The vertical fold change (FC) threshold ( $\log_2(1) = 0$ ) line indicates an increase or decrease in concentration of metabolites: negative  $\log_2(FC)$  values indicate lower concentrations, and positive values indicate higher concentrations of metabolites. R2, R3, R4, R5 & R6 are the pairwise comparison of rootstocks; R2) PMR-CLL vs. PMS-CLL, R3) PMR-CLC vs. PMS-CLL R4) PMR-CLC vs. PMR-CLL, R5) PMS Mickey Lee vs. PMS-CLL, and R6) UG-ML vs. SG-ML RS. S2, S3, S4, S5 & S6 are the pairwise comparison of the corresponding scion; S2) ML grafted on PMR-CLL vs. ML grafted on PMS-CLL, S3) ML grafted on PMR-CLC vs. ML grafted on PMS-CLL, S4) ML on PMR-CLC vs. ML on PMR-CLL, S5) PMS Mickey Lee vs. ML grafted on PMS-CLL, and S6) UG-ML vs. SG-ML on ML RS. 5-hydroxyindole-3-

acetate, choline, melatonin, fumarate, glucose and fructose were identified as significant metabolites from PMR rootstock and scion comparisons R2, R3, R4, S2, & S3. Glucose and fructose were identified as significant metabolites in PMS-CLL rootstock and scion comparisons R5, S4, & S5.

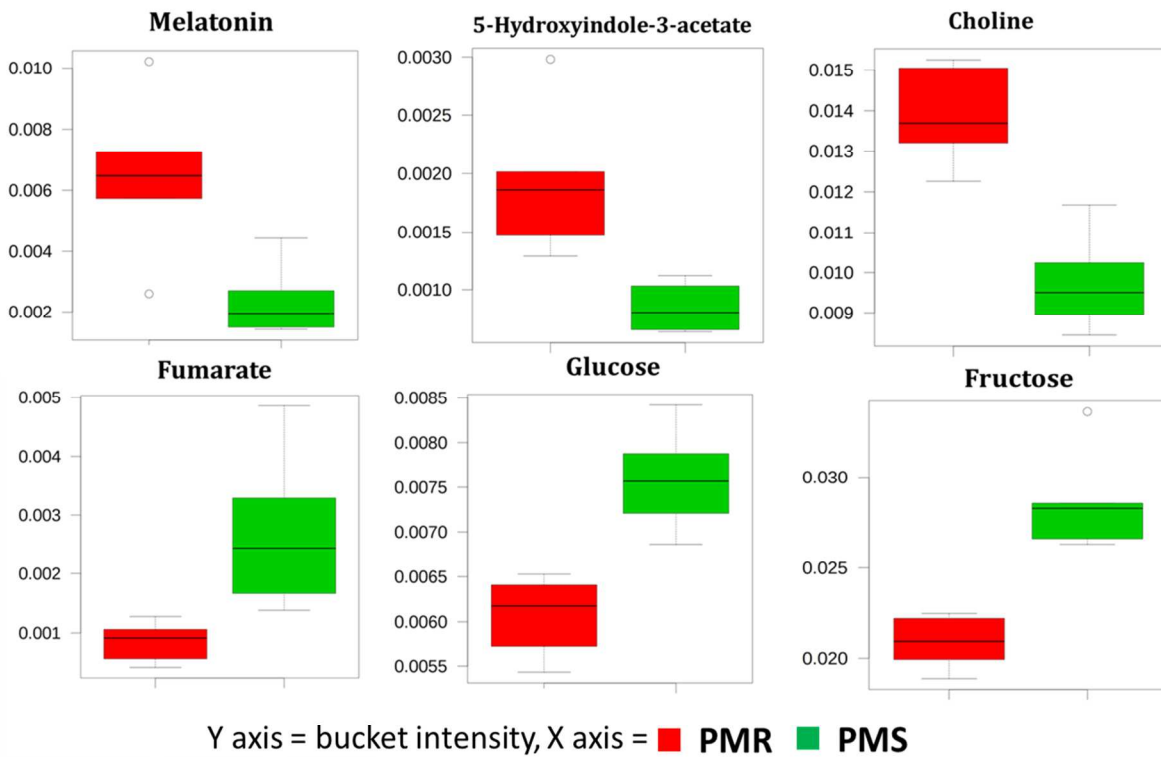

**Supplemental Figure 5. Box and whisker plots.** Box plots indicate the highest percent of the individual metabolites' concentration variability. Whisker plots (lines extending vertically above and below the box) indicate concentration range if outside the box; and circles indicate outliers in the data that are not included between the Whiskers. Choline, 4-hydroxyindole-3-acetate, and melatonin are present in higher concentrations in PMR. In PMS, fumarate, glucose, and fructose

are present in increased concentrations. Note: the y axis indicates bucket intensity which is directly proportional to concentration.
